# Supplementary material for: Carbon nanotubes—mesoporous silica composites as controllable biomaterials
Source: Royal Society of Chemistry journal article supplement (doi:10.1039/b909628k), 2009-01-01
Supplement: b909628k.pdf [file b909628k.pdf]

## Supporting Information

### Carbon Nanotubes - Mesoporous Silica composites as controllable biomaterial.

Mercedes Vila<sup>a,b</sup>, José Luis Hueso<sup>a,b</sup>, Miguel Manzano<sup>a,b</sup>, Isabel Izquierdo-Barba<sup>a,b</sup>, Alicia de Andrés<sup>c</sup>, Jorge Sánchez-Marcos<sup>c</sup>, Carlos Prieto<sup>c</sup> and María Vallet-Regí<sup>a</sup>

a,b). Dept. Química Inorgánica y Bioinorgánica. Facultad de Farmacia. Universidad Complutense de Madrid. Plaza de Ramón y Cajal s/n. 28040 Madrid. Spain Centro de Investigación Biomédica en Red. Bioingeniería, Biomateriales y Nanomedicina, CIBER-BBN.c). Instituto de Ciencia de Materiales de Madrid. CSIC. Cantoblanco.Madrid.28049. Spain

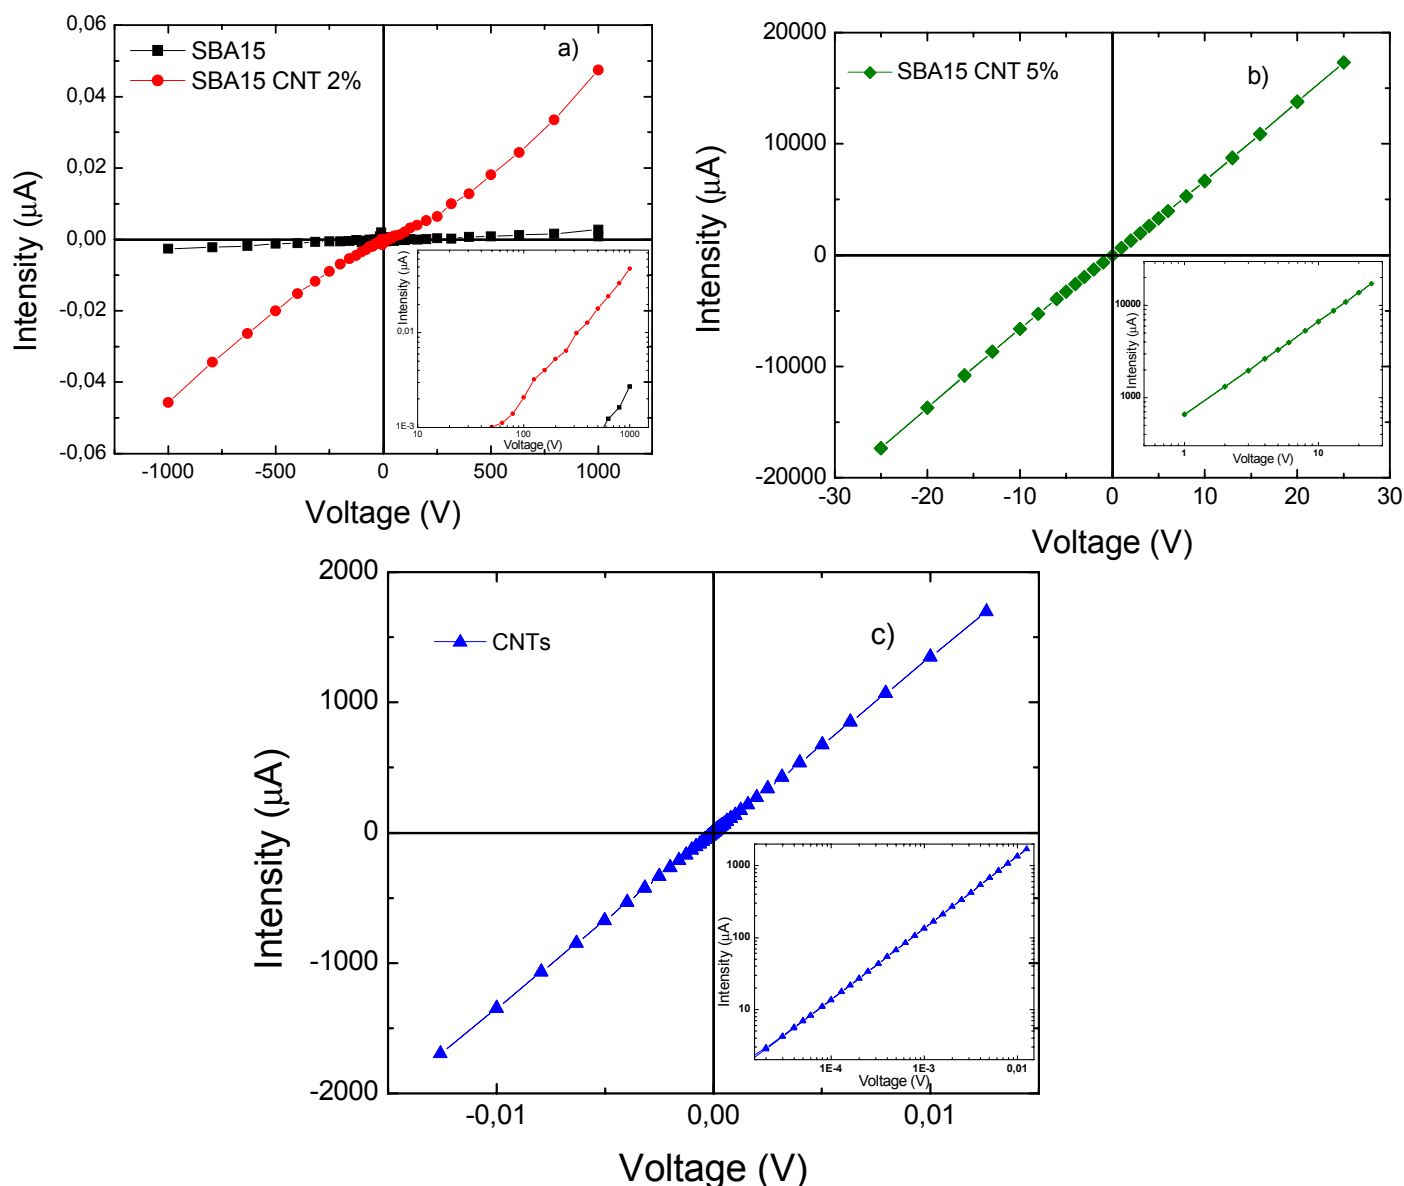

Fig. S1. Intensity (I) vs. voltage (V) curves. They are given separately because of the different resistance of samples: SBA15 and SBA15 CNT 2%, figure a), SBA15 CNT 5%, figure b) and CNTs, figure c). Under this representation, resistances are obtained from the inverse of the slope, which vary 8 orders of magnitude, from  $1 \times 10^{11} \Omega$  for SBA15 to  $1 \times 10^3 \Omega$  for SBA15 CNT 5%. Additionally, log/log representations are inserted in the figures in order to show the behaviour along several decades.
